# Supplementary material
Source: Springer Nature journal article supplement (https://www.springermedizin.de/resource/supplementary/13075_2010_3035_MOESM13_ESM.pdf/9693626)

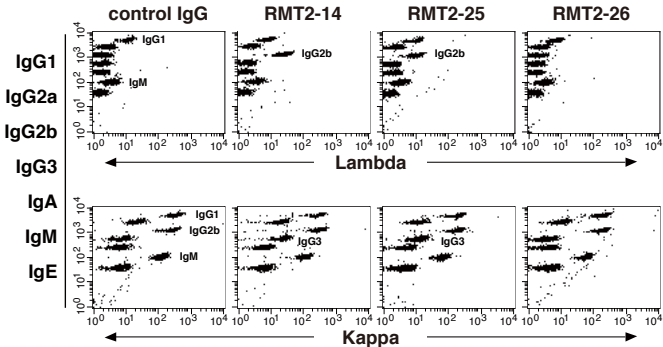

Supplement: MOESM13 [file 9693626]
